# Supplementary material for: Selection of suitable reference genes for assessing gene expression in pearl millet under different abiotic stresses and their combinations
Source: PubMed Central journal article supplement (PMC4789795; doi:10.1038/srep23036), 2016-03-14
Supplement: srep23036-s1.pdf [file srep23036-s1.pdf]

## Supplementary Data

**Selection of suitable reference genes for assessing gene expression in pearl millet under different abiotic stresses and their combinations**

**Radha Shivhare<sup>1‡</sup> and Charu Lata<sup>1, 2‡\*</sup>**

<sup>1</sup>**CSIR-National Botanical Research Institute, Rana Pratap Marg, Lucknow-226001, India**

<sup>2</sup>**National Research Centre on Plant Biotechnology, Pusa Campus, New Delhi-110012, India**

‡: Contributed equally to this study

### **\* Address for correspondence**

Charu Lata

CSIR-National Botanical Research Institute,

Rana Pratap Marg, Lucknow-226001, India

Phone: +91-522-2297996, Fax: +91-522-2205839

E-mail: charulata@nbri.res.in; charulata14@gmail.com

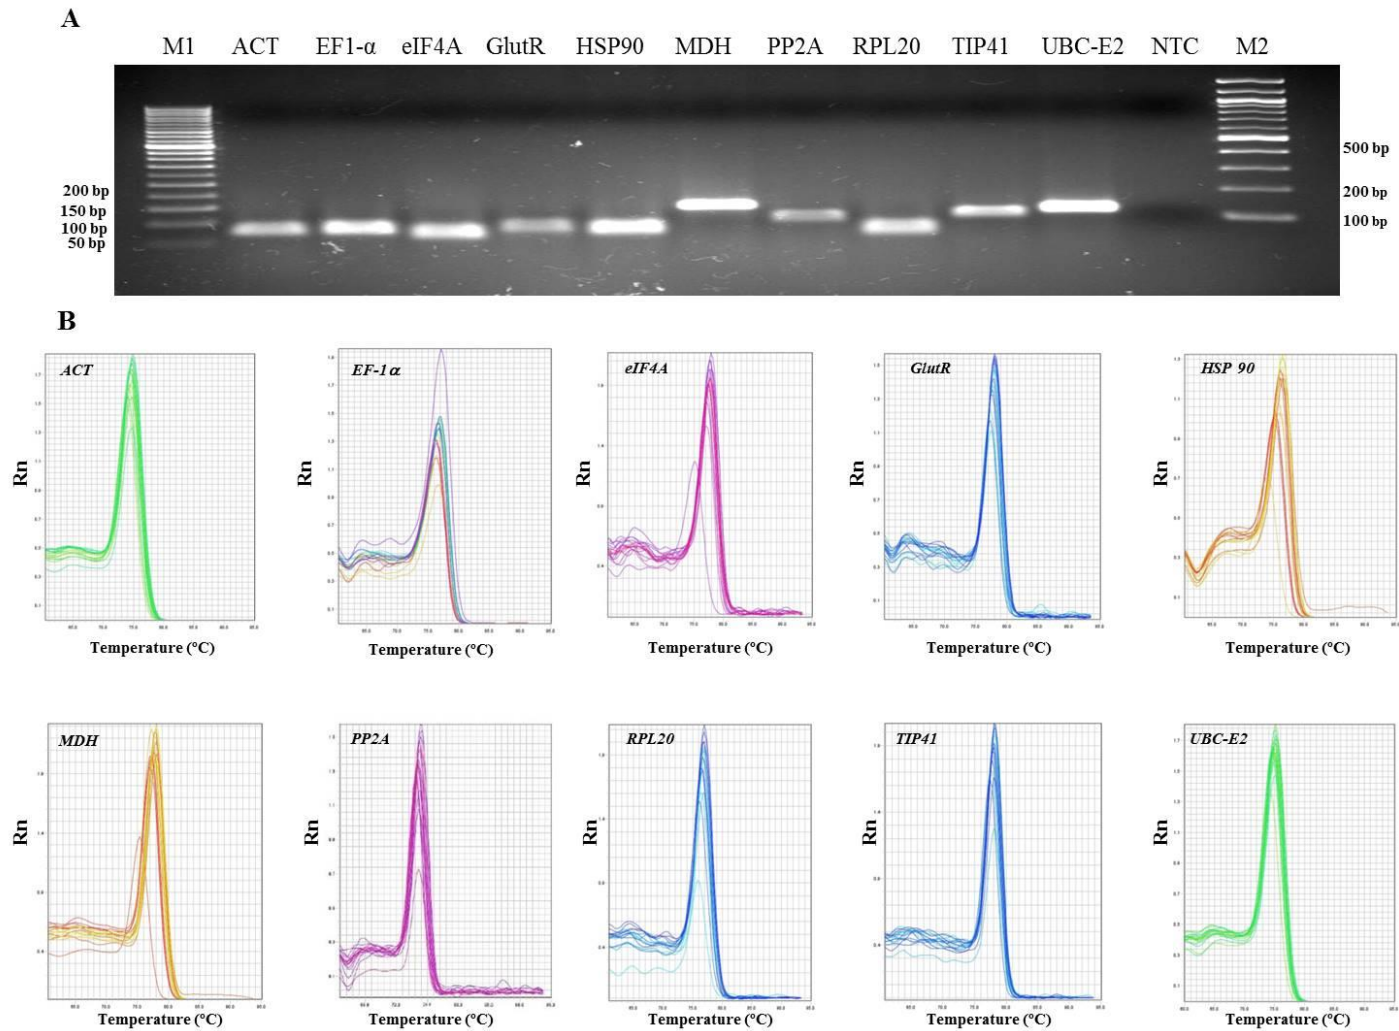

**Figure S1.** Specificity and confirmation of qRT-PCR amplicon. **(A)** 2% formaldehyde-agarose gel showing amplification of single product of the expected size for each reference gene. M1 represent 50 bp and M2 represent 100 bp DNA ladder, respectively. **(B)** Dissociation curve analysis to conform single peak amplification for each primer pair via real-time PCR.

**Table S1.** Description of primer sequences of candidate reference genes used for qRT-PCR, product size and amplicon characteristics

| Genes         | Primer pair (5'-3')                                       | Amplicon size (bp) | PCR Efficiency (E) | R <sup>2</sup> |
|---------------|-----------------------------------------------------------|--------------------|--------------------|----------------|
| ACT           | F-AACCCCAAGGCCAATAGAGAGA<br>R-CATACATTGCCGGACATTCAA       | 70                 | 0.87               | 0.94           |
| EF-1 $\alpha$ | F- GTTACAACCCAGACAAGATTGC<br>R-TGGACCTCTCAATCGTGTTG       | 72                 | 0.97               | 0.97           |
| eIF4A         | F-GCGTGCATGTTGTTGTTGGT<br>R-GTGACTGCCTACGCAACATGTC        | 60                 | 0.93               | 0.91           |
| GlutR         | F-TCCAGCACCCCTTATTTT<br>R-TAGCTCGGCGTGAGAGTTGTC           | 74                 | 1.0                | 0.92           |
| HSP 90        | F-TTGGTCAGTTTGGTGTGTTGGTTTC<br>R-TGCTTGGTGGTTACGACAACCTCT | 70                 | 1.0                | 0.89           |
| MDH           | F-CAAGGAAGAAGATGGATGCC<br>R-CGACGCTGGAGTTTCTTTAT          | 136                | 0.92               | 0.98           |
| PP2A          | F-TGGTAACATGGCTGCAATTC<br>R-AAATTGAGCCGGACACGA            | 95                 | 0.93               | 0.91           |
| RPL20         | F-CCCGTGTTGCTGCGTTTAT<br>R-GGGTAGGCAAAAGAGGGATTTT         | 62                 | 0.89               | 0.97           |
| TIP41         | F-AGTCTGTCTGCGAAAGGATA<br>R-TTCAGCTTCTGGGTCTTCT           | 104                | 0.94               | 0.80           |
| UBC-E2        | F-ACCGCCTGACAATCCCTATG<br>R-GGGATAGTCTGGCGGAAAATG         | 119                | 1.2                | 0.93           |

**Table S2.** Distribution of the Ct values of each candidate reference genes across the individual stress samples set of pearl millet

| <b>Genes</b>  | <b>Control</b> | <b>Cold 1 h</b> | <b>Cold 24 h</b> | <b>Heat 1 h</b> | <b>Heat 24 h</b> | <b>Salt 1 h</b> | <b>Salt 24 h</b> | <b>Drought 1 h</b> | <b>Drought 24 h</b> | <b>ABA 1 h</b> | <b>ABA 24 h</b> |
|---------------|----------------|-----------------|------------------|-----------------|------------------|-----------------|------------------|--------------------|---------------------|----------------|-----------------|
| ACT           | 29.3 ± 3.9     | 28.4 ± 0.7      | 30.1 ± 0.4       | 25.8 ± 4.9      | 26.2 ± 1.2       | 25.9 ± 1.9      | 27.0 ± 1.6       | 25.5 ± 1.5         | 25.5 ± 1.9          | 23.4 ± 3.5     | 28.4 ± 3.7      |
| EF-1 $\alpha$ | 25.6 ± 1.7     | 23.6 ± 0.9      | 22.8 ± 0.5       | 22.2 ± 2.1      | 22.9 ± 2.3       | 22.8 ± 0.6      | 23.6 ± 1.3       | 22.6 ± 1.1         | 23.5 ± 0.5          | 21.6 ± 1.2     | 24.5 ± 1.3      |
| eIF4A         | 25.4 ± 1.2     | 25.2 ± 1.3      | 25.7 ± 3.6       | 22.7 ± 4.5      | 22.1 ± 3.9       | 22.8 ± 1.5      | 23.3 ± 4.0       | 22.7 ± 1.5         | 23.8 ± 3.6          | 21.2 ± 1.6     | 26.4 ± 4.2      |
| GlutR         | 23.4 ± 1.4     | 21.6 ± 1.5      | 20.1 ± 3.4       | 23.2 ± 7.8      | 23.3 ± 3.6       | 20.3 ± 1.4      | 21.4 ± 1.5       | 20.7 ± 0.8         | 21.2 ± 1.3          | 19.4 ± 0.5     | 21.8 ± 0.7      |
| HSP 90        | 24.1 ± 1.4     | 24.1 ± 1.5      | 21.1 ± 1.1       | 18.3 ± 4.2      | 21.9 ± 3.2       | 21.5 ± 2.0      | 25.3 ± 1.2       | 22.4 ± 0.2         | 25.7 ± 0.8          | 22.1 ± 1.6     | 27.0 ± 0.7      |
| MDH           | 22.8 ± 1.2     | 19.5 ± 1.2      | 22.1 ± 1.5       | 21.7 ± 3.6      | 24.8 ± 1.3       | 20.3 ± 0.1      | 22.1 ± 1.1       | 19.3 ± 1.5         | 22.4 ± 1.3          | 19.0 ± 1.2     | 22.4 ± 0.5      |
| PP2A          | 28.1 ± 4.2     | 27.1 ± 3.6      | 26.6 ± 2.7       | 27.6 ± 4.1      | 26.9 ± 1.9       | 24.3 ± 0.2      | 26.3 ± 2.4       | 24.2 ± 0.4         | 25.6 ± 0.5          | 22.6 ± 0.6     | 26.3 ± 1.8      |
| RPL20         | 22.1 ± 5.4     | 18.2 ± 0.4      | 21.0 ± 1.2       | 20.8 ± 3.4      | 18.0 ± 4.7       | 18.8 ± 1.2      | 21.5 ± 0.9       | 19.2 ± 0.1         | 22.0 ± 2.1          | 19.1 ± 2.3     | 21.0 ± 0.6      |
| TIP41         | 31.7 ± 4.5     | 27.9 ± 4.7      | 28.1 ± 1.9       | 29.6 ± 1.5      | 29.2 ± 0.1       | 28.4 ± 0.7      | 28.9 ± 2.3       | 27.2 ± 0.2         | 28.8 ± 0.9          | 26.4 ± 2.7     | 25.6 ± 1.6      |
| UBC-E2        | 25.0 ± 2.7     | 26.5 ± 4.7      | 25.1 ± 2.5       | 22.9 ± 3.4      | 23.3 ± 1.8       | 22.4 ± 0.6      | 23.6 ± 1.4       | 22.0 ± 0.6         | 23.0 ± 0.7          | 20.4 ± 1.6     | 23.0 ± 0.1      |

**Table S3.** Distribution of the Ct values of each candidate reference genes across the multiple stress samples set of pearl millet

| <b>Genes</b>  | <b>Cold<br/>+ABA<br/>1 h</b> | <b>Cold<br/>+ABA<br/>24 h</b> | <b>Salt<br/>+ABA<br/>1 h</b> | <b>Salt<br/>+ABA<br/>24 h</b> | <b>Heat<br/>+ABA<br/>1 h</b> | <b>Heat<br/>+ABA<br/>24 h</b> | <b>Drought<br/>+ABA<br/>1 h</b> | <b>Drought<br/>+ABA<br/>24 h</b> | <b>Drought<br/>+Salt<br/>1 h</b> | <b>Drought<br/>+Salt<br/>24 h</b> | <b>Drought<br/>+Heat<br/>1 h</b> | <b>Drought<br/>+Heat<br/>24 h</b> | <b>Drought<br/>+ Salt<br/>+ ABA<br/>1 h</b> | <b>Drought<br/>+ Salt<br/>+ ABA<br/>24 h</b> | <b>Drought<br/>+ Salt<br/>+ Heat<br/>+ ABA<br/>1 h</b> | <b>Drought<br/>+ Salt<br/>+ Heat<br/>+ ABA<br/>24 h</b> |
|---------------|------------------------------|-------------------------------|------------------------------|-------------------------------|------------------------------|-------------------------------|---------------------------------|----------------------------------|----------------------------------|-----------------------------------|----------------------------------|-----------------------------------|---------------------------------------------|----------------------------------------------|--------------------------------------------------------|---------------------------------------------------------|
| ACT           | 28.3<br>± 2.9                | 26.9<br>± 3.1                 | 27.6<br>± 0.6                | 28.5<br>± 6.5                 | 26.0<br>± 0.3                | 27.2<br>± 3.3                 | 26.8<br>± 3.2                   | 25.2<br>± 1.5                    | 25.6<br>± 1.0                    | 25.3<br>± 1.4                     | 26.8<br>± 1.5                    | 27.5<br>± 0.5                     | 25.6<br>± 0.8                               | 24.6<br>± 2.6                                | 25.7<br>± 0.1                                          | 27.4<br>± 1.3                                           |
| EF-1 $\alpha$ | 24.2<br>± 2.6                | 22.5<br>± 2.5                 | 25.4<br>± 2.5                | 23.7<br>± 1.4                 | 23.2<br>± 2.3                | 23.5<br>± 3.2                 | 22.6<br>± 0.2                   | 23.9<br>± 1.5                    | 21.6<br>± 0.5                    | 23.2<br>± 1.6                     | 22.3<br>± 1.5                    | 24.7<br>± 0.6                     | 21.6<br>± 0.9                               | 23.9<br>± 1.0                                | 22.9<br>± 1.1                                          | 22.4<br>± 1.4                                           |
| eIF4A         | 24.8<br>± 0.8                | 23.4<br>± 0.9                 | 27.5<br>± 3.2                | 27.8<br>± 4.6                 | 23.2<br>± 4.4                | 24.3<br>± 1.6                 | 23.4<br>± 1.6                   | 23.9<br>± 3.1                    | 22.5<br>± 2.6                    | 23.3<br>± 3.0                     | 22.9<br>± 2.3                    | 24.6<br>± 1.6                     | 22.6<br>± 2.5                               | 24.2<br>± 0.8                                | 22.7<br>± 2.9                                          | 25.2<br>± 0.6                                           |
| GlutR         | 22.3<br>± 0.5                | 19.9<br>± 0.6                 | 24.2<br>± 1.5                | 22.2<br>± 0.5                 | 21.8<br>± 4.7                | 22.1<br>± 0.9                 | 21.8<br>± 1.7                   | 21.0<br>± 2.4                    | 21.6<br>± 1.5                    | 21.0<br>± 3.4                     | 22.0<br>± 2.4                    | 23.2<br>± 2.7                     | 20.4<br>± 3.0                               | 21.2<br>± 1.6                                | 21.7<br>± 2.6                                          | 22.9<br>± 0.9                                           |
| HSP 90        | 21.6<br>± 1.6                | 21.3<br>± 2.5                 | 24.2<br>± 3.5                | 25.1<br>± 2.7                 | 20.6<br>± 4.7                | 20.9<br>± 4.7                 | 23.7<br>± 0.8                   | 25.5<br>± 1.2                    | 22.9<br>± 0.7                    | 24.6<br>± 1.1                     | 19.6<br>± 1.2                    | 21.4<br>± 1.1                     | 23.4<br>± 0.2                               | 25.3<br>± 0.9                                | 19.2<br>± 1.6                                          | 21.8<br>± 1.6                                           |
| MDH           | 30.2<br>± 4.3                | 28.5<br>± 3.8                 | 30.5<br>± 4.5                | 29.3<br>± 2.0                 | 28.1<br>± 0.6                | 29.9<br>± 4.3                 | 28.4<br>± 0.9                   | 27.4<br>± 2.3                    | 28.8<br>± 1.5                    | 28.7<br>± 0.7                     | 28.5<br>± 0.5                    | 30.6<br>± 0.7                     | 26.9<br>± 0.2                               | 29.0<br>± 0.6                                | 28.6<br>± 0.1                                          | 30.4<br>± 1.8                                           |
| PP2A          | 26.3<br>± 2.7                | 24.8<br>± 2.9                 | 27.2<br>± 2.2                | 25.2<br>± 1.6                 | 26.1<br>± 2.9                | 26.4<br>± 4.1                 | 24.7<br>± 0.2                   | 26.1<br>± 0.3                    | 24.2<br>± 0.8                    | 24.8<br>± 1.8                     | 25.0<br>± 1.6                    | 28.4<br>± 0.9                     | 24.4<br>± 0.3                               | 25.8<br>± 0.5                                | 25.2<br>± 1.8                                          | 26.5<br>± 1.3                                           |
| RPL20         | 22.0<br>± 3.4                | 19.7<br>± 3.0                 | 20.3<br>± 2.7                | 22.3<br>± 1.6                 | 22.1<br>± 0.1                | 21.9<br>± 2.7                 | 20.8<br>± 3.3                   | 22.1<br>± 4.7                    | 22.3<br>± 0.2                    | 22.0<br>± 0.3                     | 21.5<br>± 2.7                    | 21.8<br>± 0.8                     | 22.3<br>± 2.7                               | 23.1<br>± 2.3                                | 20.9<br>± 2.1                                          | 21.7<br>± 1.9                                           |
| TIP41         | 30.2<br>± 4.3                | 28.5<br>± 3.8                 | 30.5<br>± 4.5                | 29.4<br>± 2.0                 | 28.1<br>± 0.6                | 29.9<br>± 4.3                 | 28.4<br>± 0.8                   | 27.4<br>± 2.3                    | 28.8<br>± 1.6                    | 28.7<br>± 0.7                     | 28.5<br>± 0.5                    | 30.6<br>± 0.7                     | 26.9<br>± 0.2                               | 29.0<br>± 0.5                                | 28.6<br>± 0.1                                          | 30.4<br>± 1.8                                           |
| UBC-E2        | 24.0<br>± 2.2                | 22.2<br>± 2.0                 | 25.8<br>± 3.5                | 24.2<br>± 2.5                 | 22.8<br>± 2.3                | 24.0<br>± 3.4                 | 22.4<br>± 0.7                   | 23.9<br>± 1.1                    | 22.0<br>± 0.4                    | 23.0<br>± 0.9                     | 22.6<br>± 1.6                    | 24.7<br>± 0.2                     | 21.9<br>± 0.3                               | 22.2<br>± 0.7                                | 22.3<br>± 1.5                                          | 24.2<br>± 0.9                                           |

**Table S4.** Distribution of the Ct values of each candidate reference genes across the developmental tissue samples set of pearl millet

| <b>Genes</b>  | <b>Leaf</b> | <b>Root</b> | <b>Stem</b> | <b>Stem sheath</b> | <b>Booting stage</b> | <b>Inflorescence</b> | <b>Seeds</b> |
|---------------|-------------|-------------|-------------|--------------------|----------------------|----------------------|--------------|
| ACT           | 26.9 ± 0.6  | 30.0 ± 4.7  | 26.3 ± 2.1  | 24.6 ± 3.7         | 20.2 ± 1.2           | 21.4 ± 0.8           | 25.5 ± 2.9   |
| EF-1 $\alpha$ | 16.0 ± 1.3  | 26.8 ± 1.2  | 21.3 ± 0.8  | 29.0 ± 1.2         | 21.6 ± 0.8           | 17.2 ± 0.7           | 20.1 ± 1.1   |
| eIF4A         | 29.4 ± 0.9  | 30.4 ± 2.0  | 22.5 ± 2.4  | 26.3 ± 4.8         | 19.2 ± 0.6           | 20.3 ± 0.6           | 20.8 ± 2.4   |
| GlutR         | 26.8 ± 1.0  | 31.4 ± 3.9  | 21.9 ± 1.2  | 24.7 ± 3.0         | 19.4 ± 1.8           | 16.8 ± 0.3           | 20.7 ± 0.8   |
| HSP 90        | 28.8 ± 1.8  | 28.4 ± 1.5  | 23.1 ± 0.3  | 23.3 ± 1.6         | 18.7 ± 1.4           | 20.1 ± 0.6           | 24 ± 0.5     |
| MDH           | 24.2 ± 0.9  | 29.4 ± 1.0  | 21.7 ± 1.6  | 22.2 ± 0.5         | 19.4 ± 1.8           | 16.3 ± 1.0           | 20.0 ± 1.3   |
| PP2A          | 32.1 ± 2.2  | 34.7 ± 2.3  | 29.3 ± 2.0  | 27.8 ± 1.7         | 21.5 ± 1.3           | 21.1 ± 1.8           | 26.4 ± 1.7   |
| RPL20         | 26.6 ± 0.8  | 28.4 ± 2.0  | 25.6 ± 3.2  | 23.3 ± 1.8         | 20.9 ± 2.1           | 20.8 ± 1.6           | 25.8 ± 2.5   |
| TIP41         | 31.7 ± 7.1  | 32.6 ± 3.8  | 30.4 ± 3.5  | 27.2 ± 3.7         | 22.8 ± 4.9           | 23.8 ± 2.6           | 26.7 ± 3.8   |
| UBC-E2        | 27.1 ± 0.8  | 31.5 ± 2.9  | 22.3 ± 0.2  | 23.5 ± 1.4         | 18.8 ± 0.9           | 18.9 ± 0.1           | 23.0 ± 0.3   |

**Table S5.** Expression stability values and rankings of 10 candidate reference genes calculated using geNorm

| Rank | Individual stress      |       | Multiple stress      |       | Tissue              |       | All samples   |       |
|------|------------------------|-------|----------------------|-------|---------------------|-------|---------------|-------|
|      | Gene                   | MV    | Gene                 | MV    | Gene                | MV    | Gene          | MV    |
| 1    | EF-1 $\alpha$   UBC-E2 | 0.286 | EF-1 $\alpha$   PP2A | 0.335 | EF-1 $\alpha$   MDH | 0.094 | PP2A   UBC-E2 | 0.218 |
| 2    |                        |       |                      |       |                     |       |               |       |
| 3    | PP2A                   | 0.317 | UBC-E2               | 0.419 | HSP90               | 0.151 | EF-1 $\alpha$ | 0.292 |
| 4    | ACT                    | 0.363 | MDH                  | 0.438 | eIF4A               | 0.187 | eIF4A         | 0.293 |
| 5    | RPL20                  | 0.455 | TIP41                | 0.445 | PP2A                | 0.261 | ACT           | 0.355 |
| 6    | HSP90                  | 0.482 | GlutR                | 0.517 | UBC-E2              | 0.271 | HSP90         | 0.374 |
| 7    | eIF4A                  | 0.492 | eIF4A                | 0.579 | ACT                 | 0.294 | MDH           | 0.462 |
| 8    | TIP41                  | 0.561 | ACT                  | 0.597 | GlutR               | 0.376 | TIP41         | 0.485 |
| 9    | GlutR                  | 0.593 | RPL20                | 0.606 | RPL20               | 0.427 | RPL20         | 0.498 |
| 10   | MDH                    | 0.603 | HSP90                | 0.677 | TIP41               | 0.476 | GlutR         | 0.516 |

**Table S6.** Expression stability values and rankings of 10 candidate reference genes calculated using NormFinder

| Rank | Individual stress |           | Multiple stress |           | Tissue        |           | All samples   |           |
|------|-------------------|-----------|-----------------|-----------|---------------|-----------|---------------|-----------|
|      | Gene              | Stability | Gene            | Stability | Gene          | Stability | Gene          | Stability |
| 1    | UBC-E2            | 0.048     | PP2A            | 0.097     | MDH           | 0.032     | EF-1 $\alpha$ | 0.061     |
| 2    | PP2A              | 0.103     | EF-1 $\alpha$   | 0.159     | HSP90         | 0.034     | PP2A          | 0.064     |
| 3    | ACT               | 0.104     | UBC-E2          | 0.161     | EF-1 $\alpha$ | 0.053     | UBC-E2        | 0.089     |
| 4    | EF-1 $\alpha$     | 0.112     | MDH             | 0.168     | UBC-E2        | 0.059     | eIF4A         | 0.089     |
| 5    | RPL20             | 0.140     | HSP90           | 0.183     | eIF4A         | 0.060     | ACT           | 0.110     |
| 6    | HSP90             | 0.140     | eIF4A           | 0.194     | ACT           | 0.074     | HSP90         | 0.114     |
| 7    | GlutR             | 0.154     | TIP41           | 0.201     | RPL20         | 0.080     | MDH           | 0.124     |
| 8    | eIF4A             | 0.167     | GlutR           | 0.215     | PP2A          | 0.082     | TIP41         | 0.132     |
| 9    | MDH               | 0.177     | ACT             | 0.242     | TIP41         | 0.102     | GlutR         | 0.146     |
| 10   | TIP41             | 0.197     | RPL20           | 0.244     | GlutR         | 0.117     | RPL20         | 0.148     |



**Table S7.** Expression stability values and rankings of 10 candidate reference genes calculated using RefFinder

| Rank | Individual stress |                          | Multiple stress |                          | Tissue        |                          | All samples   |                          |
|------|-------------------|--------------------------|-----------------|--------------------------|---------------|--------------------------|---------------|--------------------------|
|      | Gene              | Geomean of Ranking Value | Gene            | Geomean of Ranking Value | Gene          | Geomean of Ranking Value | Gene          | Geomean of Ranking Value |
| 1    | EF-1 $\alpha$     | 1.19                     | EF-1 $\alpha$   | 1.19                     | MDH           | 1.57                     | EF-1 $\alpha$ | 1.00                     |
| 2    | UBC-E2            | 2.28                     | UBC-E2          | 2.06                     | HSP90         | 2.45                     | UBC-E2        | 2.38                     |
| 3    | PP2A              | 3.03                     | PP2A            | 3.72                     | EF-1 $\alpha$ | 2.82                     | PP2A          | 3.00                     |
| 4    | TIP41             | 4.60                     | MDH             | 5.00                     | ACT           | 4.16                     | MDH           | 3.13                     |
| 5    | MDH               | 4.73                     | TIP41           | 6.00                     | PP2A          | 4.30                     | GlutR         | 5.00                     |
| 6    | ACT               | 5.42                     | GlutR           | 7.45                     | eIF4A         | 4.76                     | TIP41         | 6.09                     |
| 7    | GlutR             | 5.60                     | ACT             | 7.74                     | GlutR         | 5.18                     | ACT           | 6.24                     |
| 8    | RPL20             | 6.45                     | RPL20           | 8.74                     | TIP41         | 7.77                     | eIF4A         | 8.24                     |
| 9    | eIF4A             | 9.24                     | HSP90           | 10.0                     | RPL20         | 8.74                     | HSP90         | 8.74                     |
| 10   | HSP90             | 9.46                     | eIF4A           | 11.24                    | UBC-E2        | 10.01                    | RPL20         | 10.0                     |
